# Supplementary material
Source: publisher site journal article supplement (https://www.dovepress.com/article/213550)

Picture A. Diagram of anemia effects to mother and child health

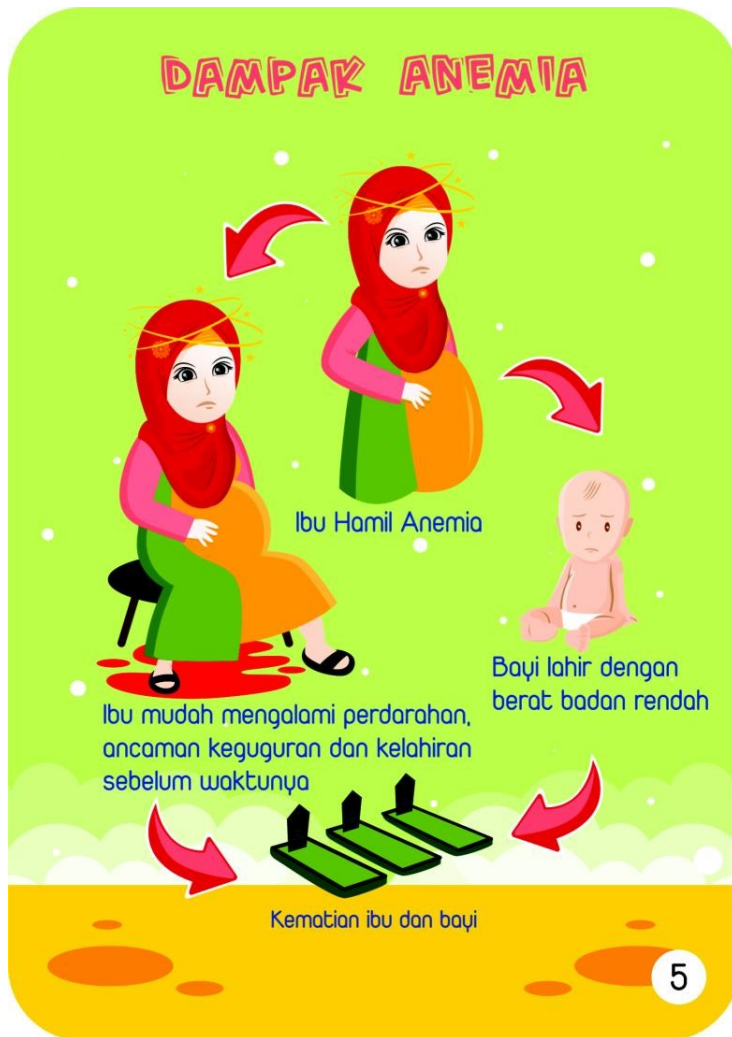

Picture B. Animal foods rich in iron

**BAHAN MAKANAN YANG MENGANDUNG ZAT BESI**

| Lauk Hewan                                                                                       | Ukuran Porsi Sekali Makan | Ukuran Dalam Gram |
|--------------------------------------------------------------------------------------------------|---------------------------|-------------------|
|  Daging Sapi    | 1 Potong Sedang           | 50                |
|  Daging Bebek   | 1 Potong Sedang           | 45                |
|  Hati Sapi      | 1 Potong Sedang           | 50                |
|  Hati Ayam      | 1 Buah Sedang             | 30                |
|  Telur Ayam    | 1 Butir                   | 50                |
|  Telur Bebek  | 1 Butir                   | 60                |
|  Cumi         | 1 Ekor Sedang             | 40                |
|  Udang        | 5 Ekor Sedang             | 35                |
|  Ikan Sardine | 2 Potong Kecil            | 40                |

7

Picture C Plant foods rich in iron

| Sayur-sayuran                                                                                             | Ukuran Porsi Sekali Makan                                                                                                                                                             | Ukuran Dalam Gram |
|-----------------------------------------------------------------------------------------------------------|---------------------------------------------------------------------------------------------------------------------------------------------------------------------------------------|-------------------|
|  <b>Kangkung</b>         | <p>1 porsi sayur adalah kurang lebih 1 gelas belimbing sayuran setelah dimasak dan ditiriskan</p>  | 100               |
| <b>Daun Katuk</b>        |                                                                                                                                                                                       | 100               |
| <b>Daun Ubi</b>          |                                                                                                                                                                                       | 100               |
| <b>Sawi</b>              |                                                                                                                                                                                       | 100               |
| <b>Bayam</b>             |                                                                                                                                                                                       | 100               |
| <b>Daun Melinjo</b>     |                                                                                                                                                                                       | 100               |
| <b>Pakis</b>           |                                                                                                                                                                                       | 100               |
| <b>Genjer</b>          |                                                                                                                                                                                       | 100               |
| <b>Kacang Panjang</b>  |                                                                                                                                                                                       | 100               |
| <b>Kecipir</b>         |                                                                                                                                                                                       | 100               |

Picture D. Fruits rich in iron and vitamin C

| Buah<br>Buahan                                                                                     | Ukuran Porsi<br>Sekali Makan | Ukuran<br>Dalam Gram |
|----------------------------------------------------------------------------------------------------|------------------------------|----------------------|
|  Salak            | 2 Buah Sedang                | 65                   |
|  Jambu Biji Merah | 2 Buah Besar                 | 100                  |
|  Kurma            | 3 Buah                       | 15                   |
|  Buah Bit         | 2 Buah Besar                 | 100                  |
|  Ubi jalar kuning | 2 Buah Sedang                | 150                  |
|  Ubi jalar ungu  | 2 Buah Sedang                | 150                  |

Buah-buahan yang banyak mengandung Vitamin C serta nutrisi lainnya yang dapat membantu penyerapan zat besi

|                                                                                               |                                                                                              |                                                                                            |                                                                                             |
|-----------------------------------------------------------------------------------------------|----------------------------------------------------------------------------------------------|--------------------------------------------------------------------------------------------|---------------------------------------------------------------------------------------------|
|  Belimbing |  Rambutan |  Pisang |  Jeruk   |
|  Mangga    |  Apel     |  Pepaya |  Alpukat |

Picture E. The iron folic acid information

## TABLET TAMBAH DARAH (TTD)



- TTD diminum setiap hari sebanyak 1 atau 2 tablet sedikitnya 90 tablet selama kehamilan
- TTD diminum dengan menggunakan air putih dan buah/tablet yang mengandung vitamin C untuk meningkatkan penyerapan zat besi
- TTD jangan diminum dengan air teh atau kopi karena dapat menurunkan penyerapan zat besi
- Periksa kehamilan sedikitnya 4 kali yaitu

|                               |        |
|-------------------------------|--------|
| Trimester pertama (1-3 bulan) | 1 Kali |
| Trimester kedua (4-6 bulan)   | 1 Kali |
| Trimester ketiga (7-9 bulan)  | 2 Kali |

12

Picture F. Example of page with the Quran quotes

# KEHAMILAN SEHAT TANPA ANEMIA

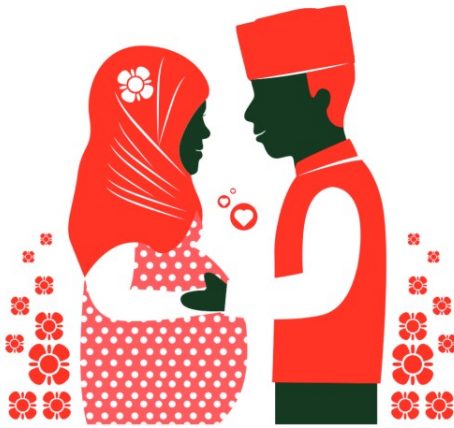

**"Dan hendaklah takut kepada Allah orang-orang yang seandainya meninggalkan dibelakang mereka anak-anak yang lemah, yang mereka khawatir terhadap (kesejahteraan) mereka.**

**Oleh sebab itu hendaklah mereka bertakwa kepada Allah dan hendaklah mereka mengucapkan perkataan yang benar"**

**Q.S An-Nisaa Ayat 9**

Picture G. Front cover of the pictorial handbook

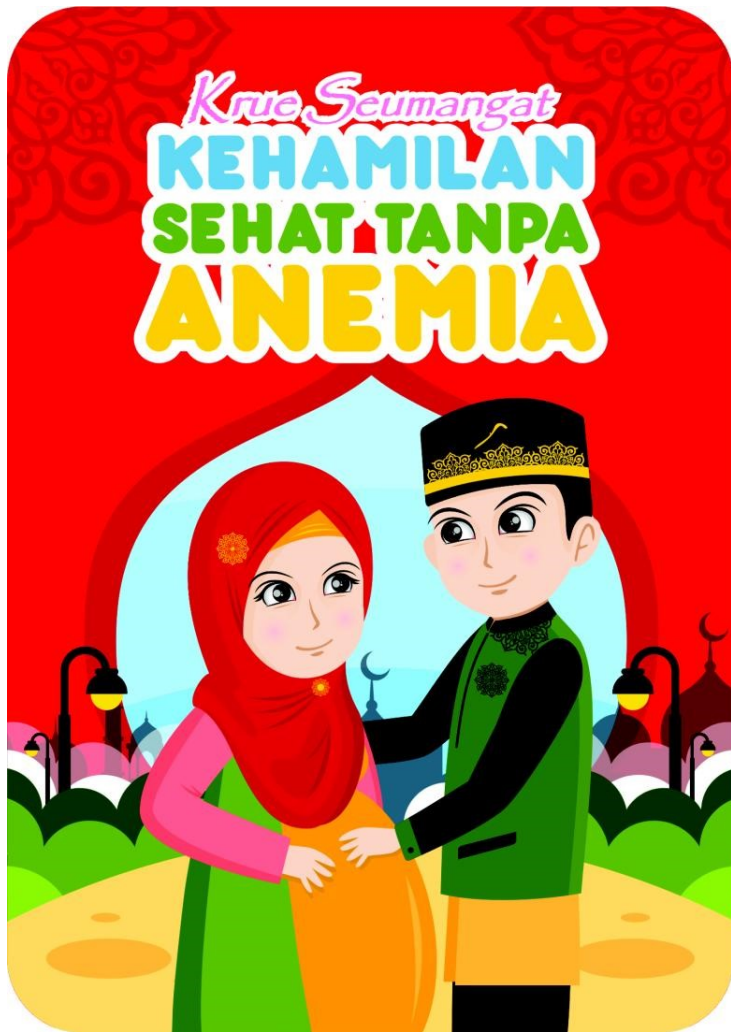

Supplement: Supplementary file 2 [file get_supplementary_file.php]
